# Supplementary material for: Comparative Analysis of Regulatory Elements between Escherichia coli and Klebsiella pneumoniae by Genome-Wide Transcription Start Site Profiling
Source: PLoS Genet. 2012 Aug 9;8(8):e1002867. doi: 10.1371/journal.pgen.1002867 (PMC3415461; doi:10.1371/journal.pgen.1002867)
Supplement: Table S6 — Comparison analysis of sRNA target sites between E. coli and K. pneumoniae. (XLSX) [file pgen.1002867.s012.xlsx]

## Sheet: Comparison of target sites
The first two columns, "sRNA name" and "Target gene", indicate the name of sRNA and the name of target gene of the sRNA.
The next 4 columns indicate gene ID of the target gene, strand, distance of target sites to ATG, and the sequence of target site in E. coli.
The next 4 columns indicate gene ID of the target gene, strand, distance of target sites to ATG, and the sequence of target site in K. pneumoniae.
The last column, "Target sequence identity", indicates the sequence of identity of target sites of sRNA to the target gene.
				E. coli				K. pneumoniae
sRNA name	Target gene	Gene ID	Strand	Distance to ATG	Target site sequence	Gene ID	Strand	Distance to ATG	Target site sequence	Target sequence identity
sgrS	ptsG	b1101	+	-27 ~ 4	CACCCATACTCAGGAGCACTCTCAATTATGTT	KPN_01099	+	-27 ~ 4	ACCAAATACTCAGGAGCACTCTCAATTATGTT	0.875
sgrS	manX	b1817	+	24 ~ 37	ACACATGGTTGGGC	KPN_02333	+	24 ~ 37	ACACATGGTTGGGC	1
arcZ	rpoS	b2741	-	-119 ~ -96	GAAATTCGTTACAAGGGGAAATCC	KPN_03103	-	-214 ~ -191	GAAATTCGTTACAAGGGGAAATCC	1
cyaR	ompX	b0814	+	-8 ~ 2	AGGTGGTTATG	KPN_00843	+	-8 ~ 2	AGGTGGTTATG	1
cyaR	nadE	b1740	+	-10 ~ 3	GAGGGGTTCAATGA	KPN_01228	-	-10 ~ 3	GGAGGGCGCGATGA	0.642857
cyaR	yqaE	b2666	-	-3 ~ 16	CATATGGGTTTCTGGAGAAT	KPN_01503	+	-3 ~ 16	GTTATGGGATTCTGGAGAAT	0.85
cyaR	luxS	b2687	-	-11 ~ 3	GAGGTGGCTAAATGC	KPN_03018	-	-10 ~ 3	GAGGTGACGAATGC	0.8
dsrA	rpoS	b2741	-	-118 ~ -96	AAATTCGTTACAAGGGGAAATCC	KPN_03103	-	-213 ~ -191	AAATTCGTTACAAGGGGAAATCC	1
fnrS	gpmA	b0755	-	-12 ~ 4	AGGAGTAAGTATATGGC	KPN_00768	-	-12 ~ 4	AGGAGTGAGAGAATGGC	0.764706
fnrS	maeA	b1479	-	-20 ~ 10	TTCAAAAAAGAGTGAGTGACATGGAACCAAA	KPN_01847	+	-22 ~ 10	TCATGATCAAGGAGTTAGTGCGATGCAATTTAC	0.545455
fnrS	sodB	b1656	+	-37 ~ 20	TTGTACGTATGCAAATTAATAATAAAGGAGAGTAGCAATGTCATTCGAATTACCTGCA	KPN_01994	+	-36 ~ 20	TGTGAGATAAAACAAAAAGTTATAAGGAGAGTAGCAATGTCGTTTGAATTACCTGCA	0.724138
fnrS	folE	b2153	-	-26 ~ -14	CGTCACACCTGCA	KPN_02591	-	-25 ~ -13	CGCCACACCTGCA	0.923077
fnrS	yobA	b1841	-	-17 ~ 18	AAAAAGGAATAGATAATATGGCTTCAACTGCACGCT	KPN_02358	-	-8 ~ 30	AAAAGGGAATGACGAATATGCGACTTCTTGCTGGACGCG	0.666667
fnrS	folX	b2303	+	-24 ~ -2	AAGTAAAACAACGGAGAACCTGC	KPN_02693	+	-26 ~ -2	GACTTACACCACGGAGGAAGCCTGC	0.68
fnrS	metE	b3829	+	-17 ~ 13	AATTAGAGGAAGAAAAAATGACAATATTGAA	KPN_04325	+	-18 ~ 13	AATAAGAGAGGAACAAAAATGACAATTATTAA	0.71875
fnrS	sodA	b3908	+	-18 ~ 16	ACAATACTGGAGATGAATATGAGCTATACCCTGCC	KPN_04217	+	-6 ~ 28	ACAATAATGGAGATGATTATGAGCTATACCCTGCC	0.942857
gcvB	oppA	b1243	+	-18 ~ 21	GAGGGAGTCCAAAAAACAATGACCAACATCACCAAGAGAA	KPN_02197	-	-18 ~ 21	GACTGGAGTTACAACACAATGACCATCATCACTAAAAAGC	0.625
gcvB	sstT	b3089	+	-23 ~ -13	CAACACAATGA	KPN_03517	+	-24 ~ -13	CTACATCACTGG	0.666667
gcvB	dppA	b3544	-	-41 ~ -8	CAAAGGGTTAAAACAACAAACATCACAATTGGAG	KPN_03899	-	-70 ~ -35	CGGCGGATATATGCAAACAACATCACAATTTTGGAG	0.666667
gcvB	cycA	b4208	+	-25 ~ 7	CAGACAGGTACAGGAAGAAAAAAACATGGTAGA	KPN_04601	+	-27 ~ 7	CAGACAGGTACAACAGGAAGAAATCACATGGTAGA	0.828571
glmZ	glmS	b3729	-	-39 ~ -21	CAGGTTGACCGACAACGAT	KPN_04134	-	-49 ~ -26	CAGGTCAGCGACAACGCATGGCAT	0.6
micA	ompX	b0814	+	1 ~ 23	TGAAAAAAATTGCATGTCTTTCA	KPN_00843	+	1 ~ 23	TGAATAAAATTGCACGTCTTTCA	0.913043
micA	ompA	b0957	-	-20 ~ -5	ATGATAACGAGGCGCA	KPN_00986	-	-20 ~ -5	ATGATAATGAGGCGCA	0.9375
micA	phoP	b1130	-	-14 ~ 8	AGGGAGAAATAAAAATGCGCGTA	KPN_01136	-	-13 ~ 8	AGGGAGAACAGCCATGCGCGTA	0.782609
micC	ompC	b2215	-	-40 ~ -14	TAAAAAAGCAAATAAAGGCATATAACA	KPN_02636	-	-36 ~ -14	TAATAAAAGGCATATAACAAACA	0.592593
micM	chiP	b0681	+	-18 ~ -7	GTCAAAGAGGAT	KPN_00703	+	-18 ~ -7	GTCAAAGAGGAT	1
omrA	cirA	b2155	-	-34 ~ -9	TTTTATTTTCGTAGTTACCTCATGGA	KPN_02593	-	-90 ~ -63	TTGTTTGTTTGGTTGTACACCTCATGGA	0.75
omrB	cirA	b2155	-	-34 ~ -9	TTTTATTTTCGTAGTTACCTCATGGA	KPN_02593	-	-90 ~ -63	TTGTTTGTTTGGTTGTACACCTCATGGA	0.75
rprA	rpoS	b2741	-	-116 ~ -93	ATTCGTTACAAGGGGAAATCCGTA	KPN_03103	-	-211 ~ -188	ATTCGTTACAAGGGGAAATCCGTC	0.958333
rybB	ompW	b1256	+	-12 ~ 20	GACGGAGCGGATATGAAAAAGTTAACAGTGGCG	KPN_01248	+	24 ~ 56	GAGGAAGTGGATATGAAGAAGTTAGCAGCGGCG	0.818182
rybB	ompC	b2215	-	-32 ~ 0	CAAATAAAGGCATATAACAGAGGGTTAATAACA	KPN_02636	-	-28 ~ 0	GGCATATAACAAACAGAGGGTTAATAACA	0.727273
ryhB	sdhC	b0721	+	342 ~ 381	GTTATTACTGTCGTGCTTTCACTTCTCGCAGGAGTCCTCG	KPN_00728	+	228 ~ 267	GTTATTACTGTCGTGCTTTCACTTCTCGCAGGAGTCCTCG	1
ryhB	sodB	b1656	+	-12 ~ 5	AGGAGAGTAGCAATGTCA	KPN_01994	+	-11 ~ 5	GGAGAGTAGCAATGTCG	0.888889
ryhB	iscS	b2530	-	-25 ~ 0	AGTGATGTACGGAGTTTATAGAGCAA	KPN_02862	-	-24 ~ 0	AGTGATGTACGGAGTTTAAGAGCAA	0.961538
ryhB	cysE	b3607	-	-3 ~ 9	GCAATGTCGTGTG	KPN_03951	-	-3 ~ 9	GCAATGCCGTGTG	0.923077
